# Supplementary material for: In situregulation of dendrite-free lithium anode by improved solid electrolyte interface with defect-rich boron nitride quantum dots
Source: Royal Society of Chemistry journal article supplement (doi:10.1039/d2ta05511b), 2022-01-01
Supplement: d2ta05511b1.pdf [file d2ta05511b1.pdf]

## Supporting Information

### ***In-situ* regulation of dendrite-free lithium anode by improved solid electrolyte interface with defect-rich boron nitride quantum dots**

*Jun Pu,<sup>a,d</sup> Pan Xue,<sup>b</sup> Taotao Li,<sup>b</sup> Jianghua Wu,<sup>b</sup> Kai Zhang,<sup>b</sup> Kaiping Zhu,<sup>b</sup> Shaohua Guo,<sup>b</sup>*

*Guo Hong,<sup>a,\*</sup> Haoshen Zhou,<sup>c,\*</sup> and Yagang Yao,<sup>b,\*</sup>*

<sup>a</sup> Department of Materials Science and Engineering, College of Engineering, City University  
of Hong Kong, 83 Tat Chee Avenue, Kowloon, Hong Kong SAR 999077, China

<sup>b</sup> National Laboratory of Solid State Microstructures, College of Engineering and Applied  
Sciences, Jiangsu Key Laboratory of Artificial Functional Materials, Collaborative  
Innovation Center of Advanced Microstructures, Nanjing University, Nanjing 210093, China

<sup>c</sup> Graduate School of System and Information Engineering, University of Tsukuba, 1-1-1,  
Tennoudai, Tsukuba 305-8573, Japan

<sup>d</sup> Key Laboratory of Functional Molecular Solids, Ministry of Education, College of  
Chemistry and Materials Science, Anhui Normal University, Wuhu 241002, P.R. China

\* Corresponding author

Guo Hong: E-mail: [galen.hong@gmail.com](mailto:galen.hong@gmail.com)

Haoshen Zhou: E-mail: [hs.zhou@aist.go.jp](mailto:hs.zhou@aist.go.jp)

Yagang Yao: E-mail: [ygyao2018@nju.edu.cn](mailto:ygyao2018@nju.edu.cn)

## Experimental Section

### *Density functional theory calculation:*

The Li-ion adsorption on different BN materials was modeled using the CASTEP code.<sup>[1]</sup> In geometric optimization and energy calculation, the cutoff energy of the plane-wave bases was set to 500 eV. The Perdew-Burke-Ernzerh of version of the generalized gradient approximation was used to describe exchange correlation effects.<sup>[2,3]</sup> The Brillouin zone was sampled using a 3×3×1 Monkhorst-Pack mesh k-points. The binding energy ( $E_b$ ) was defined as:

$$E_b = E_{sub} + E_{Li} - E_{sub+Li}$$

where the  $E_{sub+Li}$ ,  $E_{sub}$ , and  $E_{Li}$  represent the ground-state energies of the substrate-Li, substrate, and Li-ion, respectively. The diffusion barrier of Li on the surfaces of different substances was evaluated by transitional state locating using the Nudged-Elastic-Band method.<sup>[4,5]</sup>

### *COMSOL simulation:*

The simulations were carried out on COMSOL Multiphysics 6.0 with implemented finite element solver. The electrolytic liquid was subject to the standard 1 M LiTFSI system, and the Li-ion diffusion coefficient and electrolyte conductivity were  $1.5 \times 10^{-10} \text{ m}^2 \text{ s}^{-1}$  and  $10^{-2} \text{ S cm}^{-1}$ , respectively.<sup>[6]</sup> The current density of metallic Li electrochemical deposition was  $10 \text{ mA cm}^{-2}$ . Initial surface protuberances were introduced in the bare Li mode as Li dendrites to simplify the computation process.<sup>[7]</sup>

**Figures:**

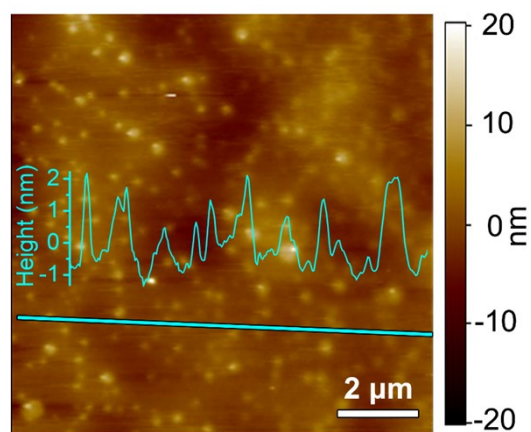

**Fig. S1.** AFM image of the BN nanosheets precursor and corresponding thickness profile along the line.

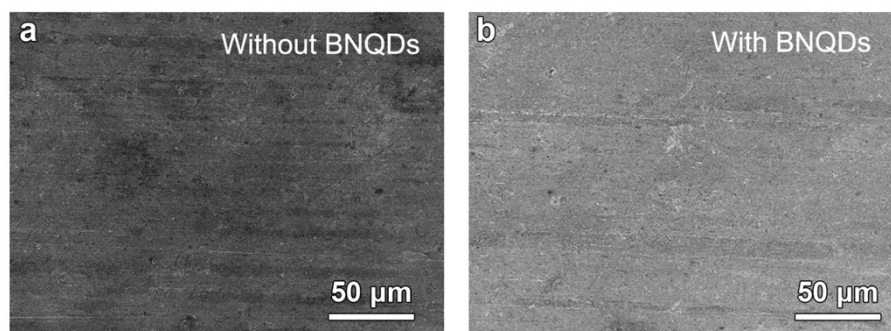

**Fig. S2.** SEM images of bare Cu foil and the as-prepared Cu with BNQDs electrodes, respectively.

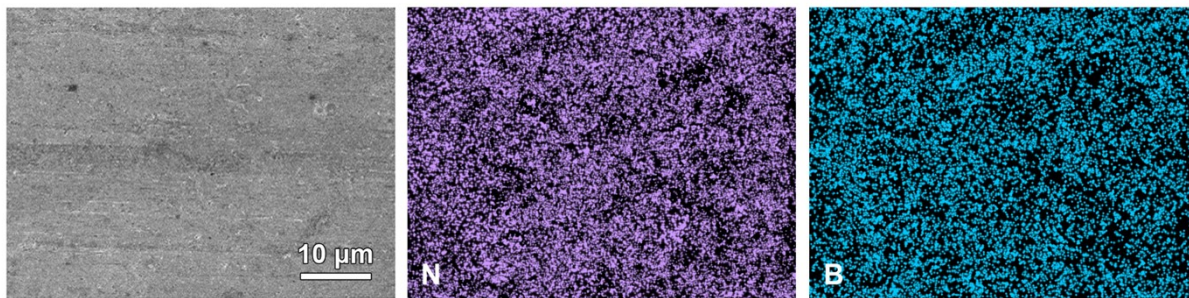

**Fig. S3.** Elemental mappings of the as-obtained electrode with BNQDs.

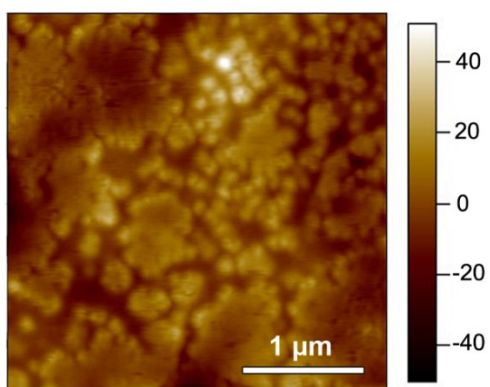

**Fig. S4.** AFM image of the BNQDs layer on Cu foil (the edge).

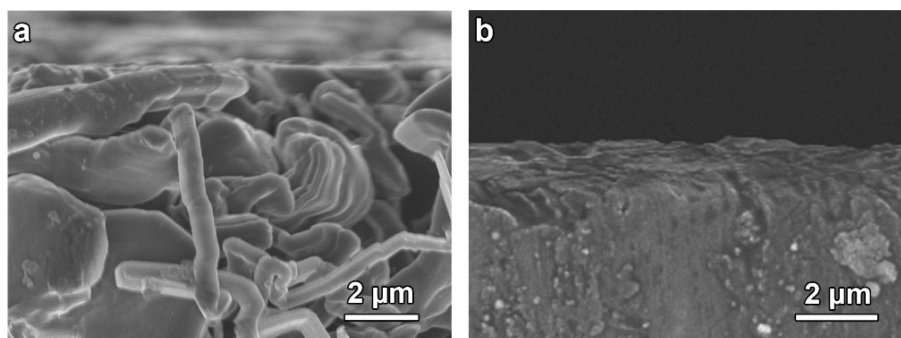

**Fig. S5.** Localized high-magnification SEM images of Li deposition in cross section: (a) without BNQDs, (b) with BNQDs.

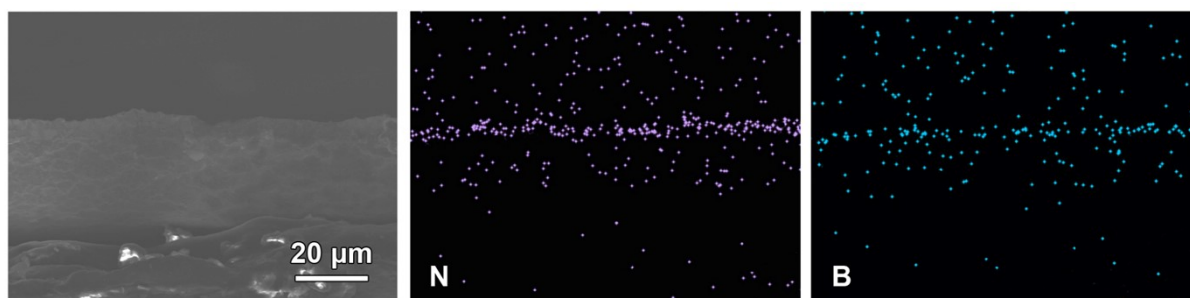

**Fig. S6.** Cross-section SEM image of cycled Li deposits with BNQDs and corresponding element mappings of B and N.

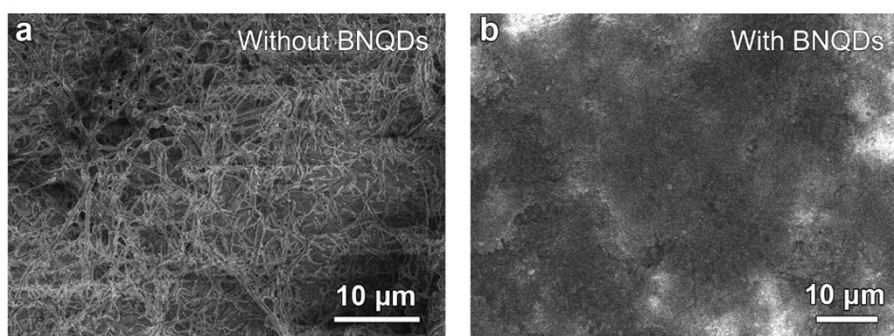

**Fig. S7.** Top surface SEM images of current collectors after Li stripping: (a) without BNQDs, (b) with BNQDs.

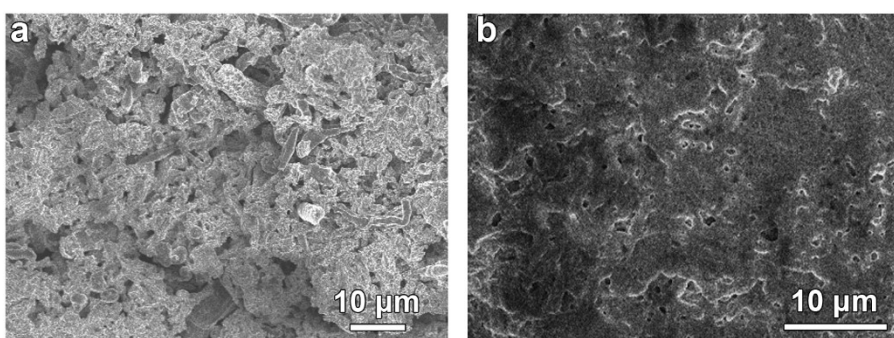

**Fig. S8.** Top surface SEM images of Li deposition after 50 cycles: (a) without BNQDs, (b) with BNQDs.

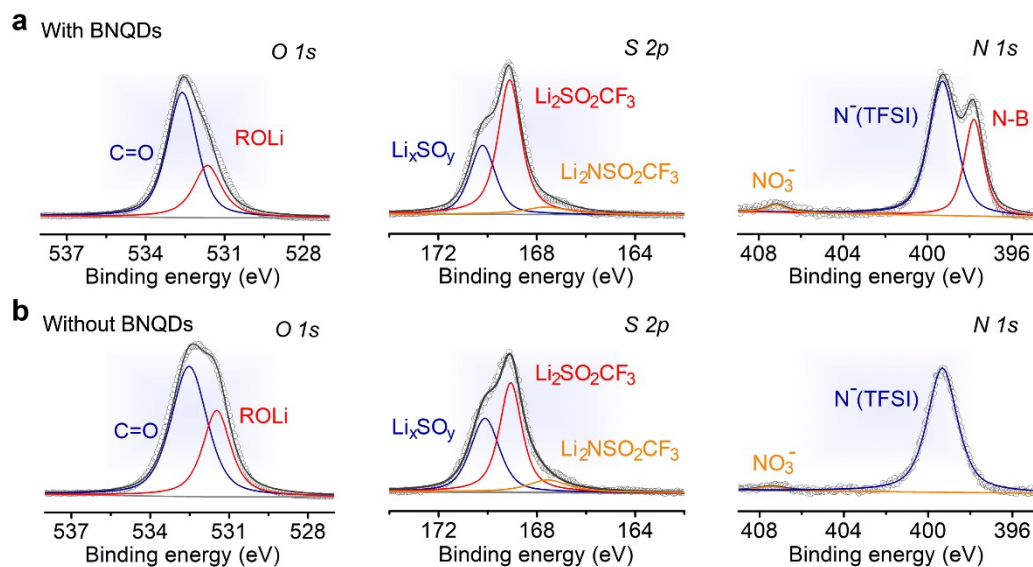

**Fig. S9.** The O 1s, S 2p, and N 1s high-resolution XPS comparison of the SEI on Li surface with (a) and without (b) BNQDs after cycling.

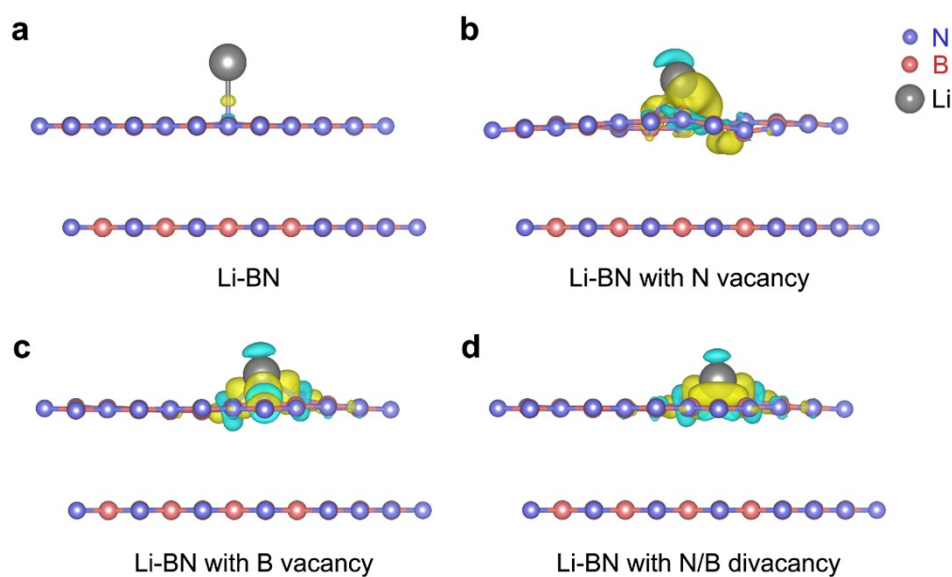

**Fig. S10.** The side view optimized adsorption configuration and charge differential density images for Li on different BN substrates: (a) initial BN, (b) BN with N vacancy, (c) BN with B vacancy, and (d) BN with N, B vacancy.



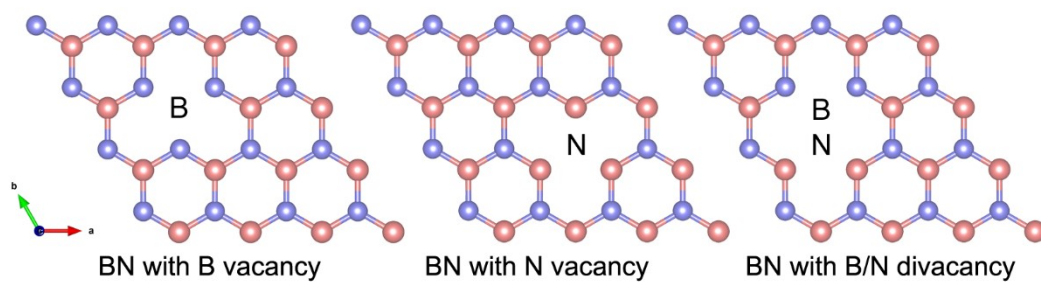

**Fig. S11.** Schematic diagrams of BN nanostructure with different defects.

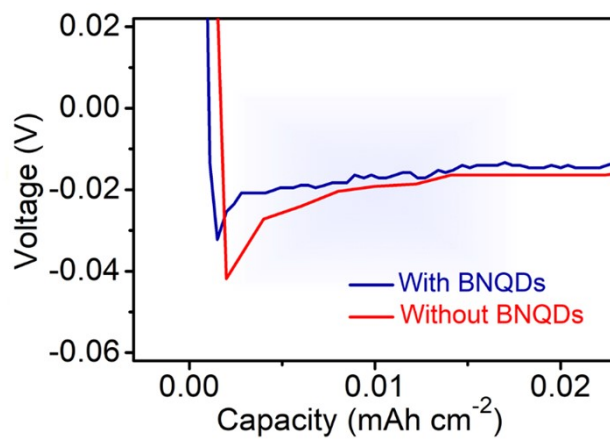

**Fig. S12.** Voltage profiles of Li electrodepositing on the Cu foils with and without BNQDs at 0.5 mA cm<sup>-2</sup>.



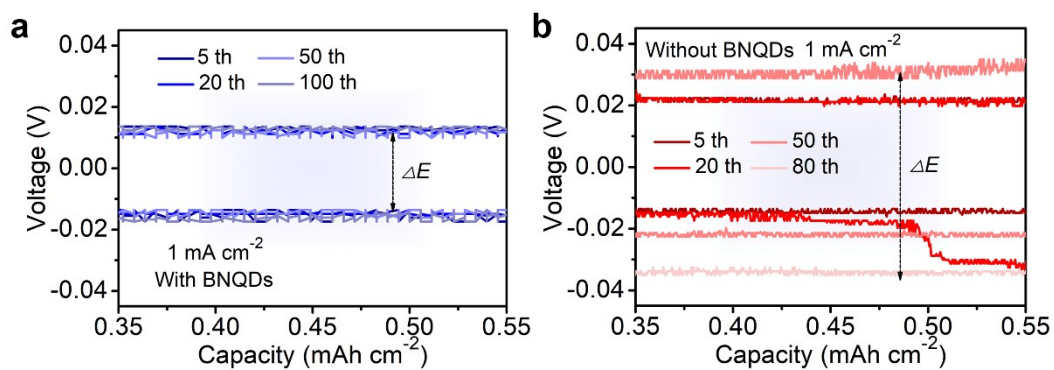

**Fig. S13.** Locally amplified voltage distribution of Li/Cu half cells at different cycles: (a) with BNQDs, (b) without BNQDs.

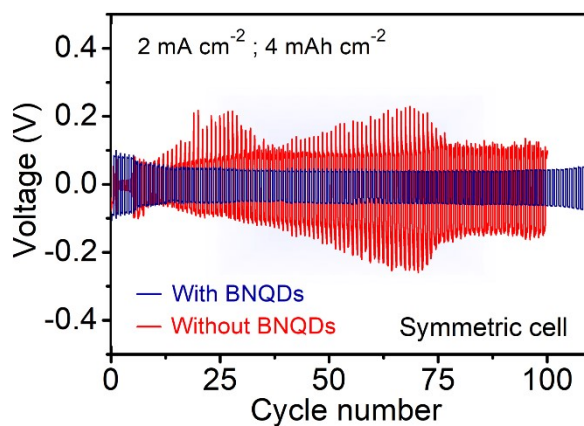

**Fig. S14.** Cycling stability of symmetric cells with a higher rate of  $2 \text{ mA cm}^{-2}$  and a limited capacity of  $4 \text{ mAh cm}^{-2}$ .

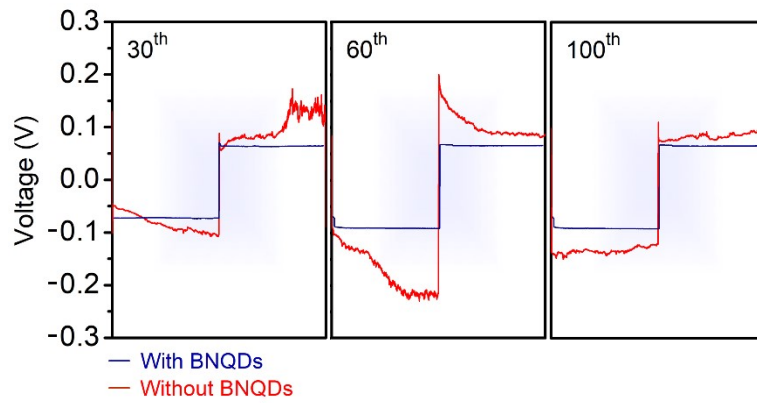

**Fig. S15.** Detailed voltage profiles of the symmetric cells at 30<sup>th</sup>, 60<sup>th</sup>, and 100<sup>th</sup> cycles.

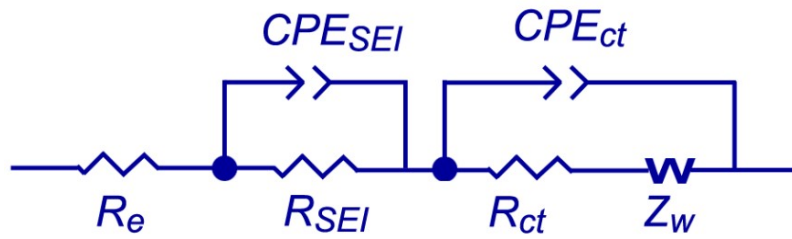

**Fig. S16.** Equivalent circuit for impedance fitting.

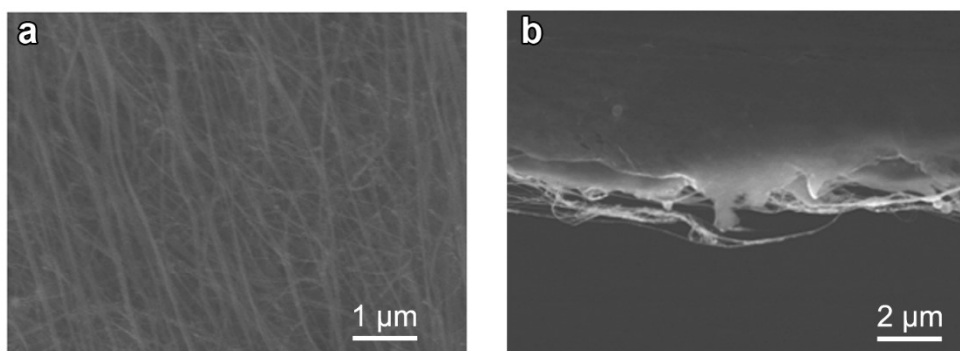

**Fig. S17.** The SEM images of CNT physical barrier as lithium polysulfides in Li-S full cells.

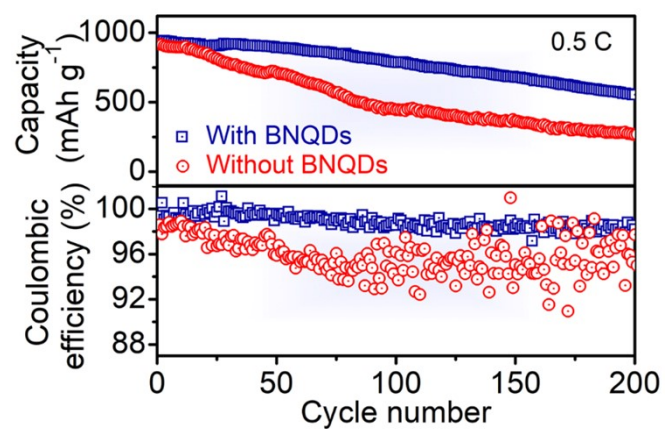

**Fig. S18.** Cycling performance of Li-S full batteries with and without BNQDs at 0.5 C.

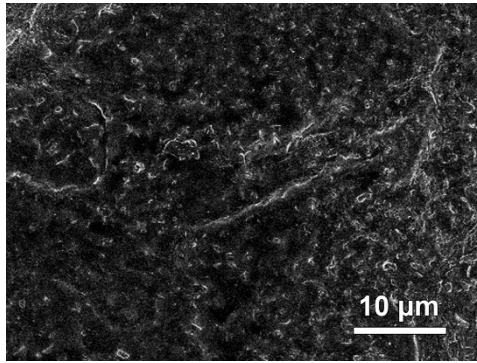

**Fig. S19.** SEM image of cycled Li anode with BNQDs in Li-S full cell.

## References

- [1] S. J. Clark, M. D. Segall, C. J. Pickard, P. J. Hasnip, M. I. J. Probert, K. Refson, M. C. Payne, *Z. Kristallogr. - Cryst. Mater.*, 2005, **220**, 567–570.
- [2] J. P. Perdew, K. Burke, M. Ernzerhof, *Phys. Rev. Lett.*, 1996, **77**, 3865–3868.
- [3] S. Grimme, *J. Comput. Chem.*, 2006, **27**, 1787–1799.
- [4] G. Henkelman, H. Jónsson, *J. Chem. Phys.*, 2000, **113**, 9978–9985.
- [5] G. Henkelman, B. P. Uberuaga, H. Jónsson, *J. Chem. Phys.*, 2000, **113**, 9901–9904.
- [6] J. Y. Wu, X. W. Li, Z. X. Rao, X. N. Xu, Z. X. Cheng, Y. Q. Liao, L. X. Yuan, X. L. Xie, Z. Li, Y. H. Huang, *Nano Energy*, 2020, **72**, 104725.
- [7] L. Ye, M. Liao, X. R. Cheng, X. F. Zhou, Y. Zhao, Y. B. Yang, C. Q. Tang, H. Sun, Y. Gao, B. J. Wang, H. S. Peng, *Angew. Chem. Int. Ed.*, 2021, **60**, 17419–17425.
